# Supplementary material
Source: MDPI journal article supplement (https://www.mdpi.com/2313-0105/9/6/320)
Supplement: s1 [file s1]

# Supporting Information

## Integrated Design of Functional Composite Electrolyte and Cathode for All-Solid-State Li Metal Batteries

Zhenghang Zhang,<sup>1†</sup> Rongzheng Fan,<sup>1†</sup> Saifang Huang,<sup>1\*</sup> Jie Zhao,<sup>1</sup> Yudong Zhang,<sup>1</sup>  
Weiji Dai,<sup>1</sup> Cuijiao Zhao,<sup>1</sup> Xin Song,<sup>2\*</sup> and Peng Cao<sup>2</sup>

<sup>1</sup>*School of Materials Science and Engineering, Jiangsu University of Science and Technology, Zhenjiang 212003, China*

<sup>2</sup>*Department of Chemical and Materials Engineering, The University of Auckland, Auckland 1142, New Zealand*

\* Corresponding Authors: s.huang@just.edu.cn (S.H.), xson574@aucklanduni.ac.nz (X.S.)

† These authors contributed equally.

The lithium-ion transference number for the electrolytes was calculated by using the Bruce–Vincent method in **Equation S1**:

$$t_{\text{Li}^+} = \frac{I_{\text{ss}} \times (V - I_0 R_0)}{I_0 \times (V - I_{\text{ss}} R_{\text{ss}})} \quad (\text{S1})$$

where  $t_{\text{Li}^+}$  is the lithium-ion transference number,  $I_0$  is the initial current,  $I_{\text{ss}}$  is the steady-state current,  $R_0$  is the initial resistance measured before polarization,  $R_{\text{ss}}$  is the steady-state resistance obtained after polarization, and  $V$  is the applied polarization voltage.

Table S1. Potentiostatic polarization data of the Li/ DL@L /Li cell before and after cycling

| V / mV | $I_0$ / mA | $R_0$ / $\Omega$ | $I_{\text{ss}}$ / mA | $R_{\text{ss}}$ / $\Omega$ | $t_{\text{Li}^+}$ |
|--------|------------|------------------|----------------------|----------------------------|-------------------|
| 10     | 0.00361    | 400.76           | 0.00124              | 272.94                     | 0.304             |

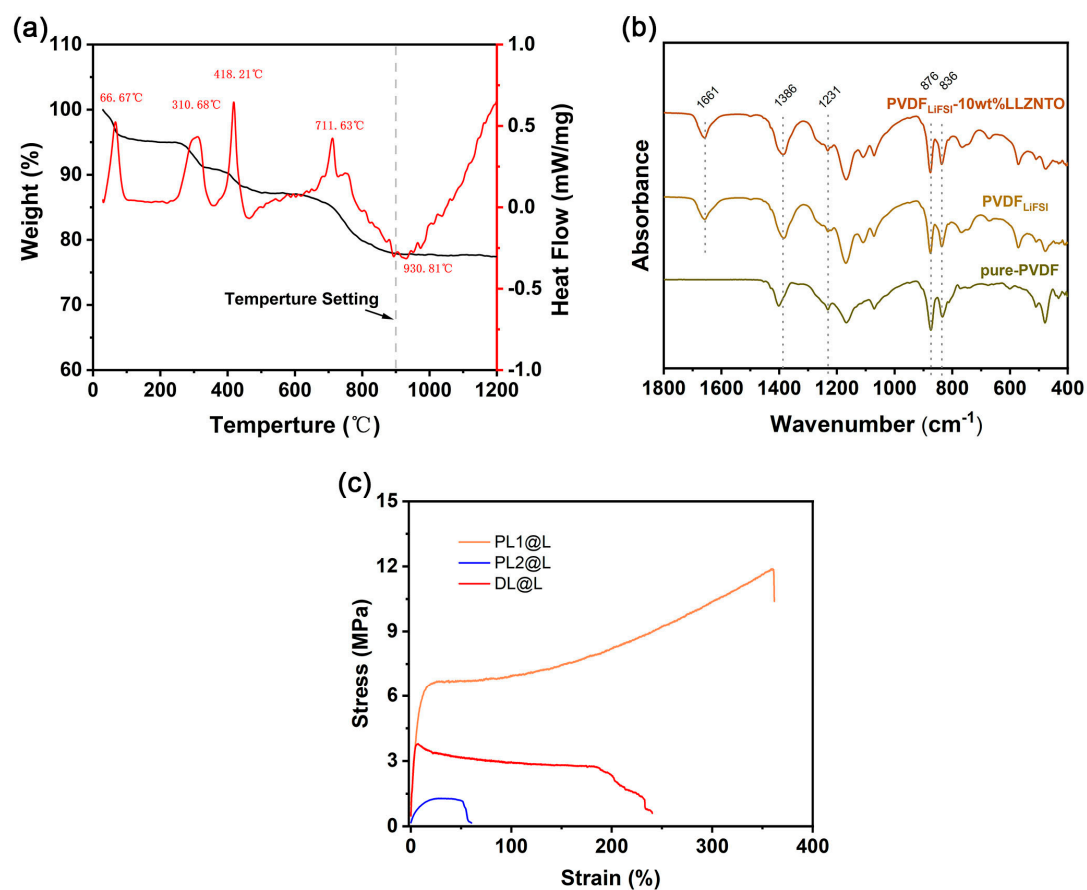

**Figure S1.** (a) TG-DSC curve of raw material powder mixture of LLZNTO, which suggesting the suitable synthesis temperature is between 850 °C and 1000 °C; (b) FT-IR spectra of pure PVDF, PVDF with Li-salt and PL1@L; (c) Mechanical tensile stress-strain curves of PL1@L, PL2@L, and DL@L solid electrolytes.

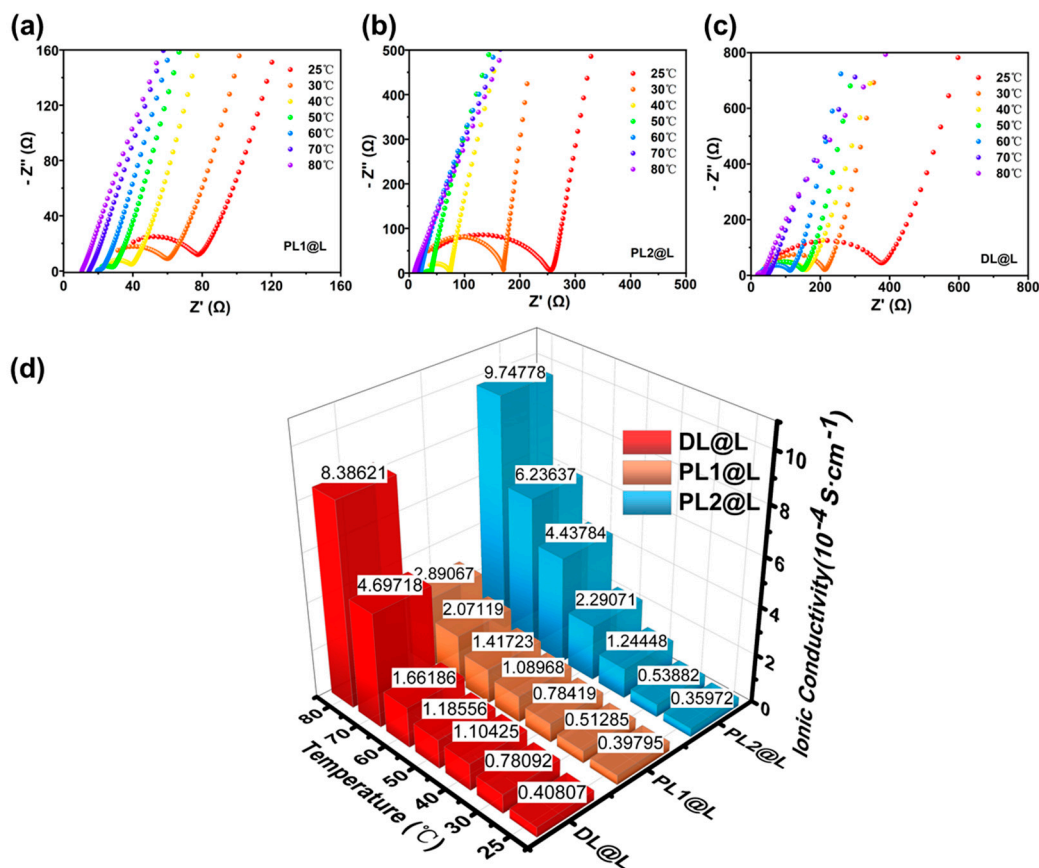

**Figure S2.** EIS spectra of (a) PL1@L (60  $\mu\text{m}$ ), (b) PL2@L (180  $\mu\text{m}$ ), (c) DL@L (260  $\mu\text{m}$ ); and (d) Ionic conductivity of PL1@L, PL2@L and DL@L at different temperature ranging from 25 to 80 °C.

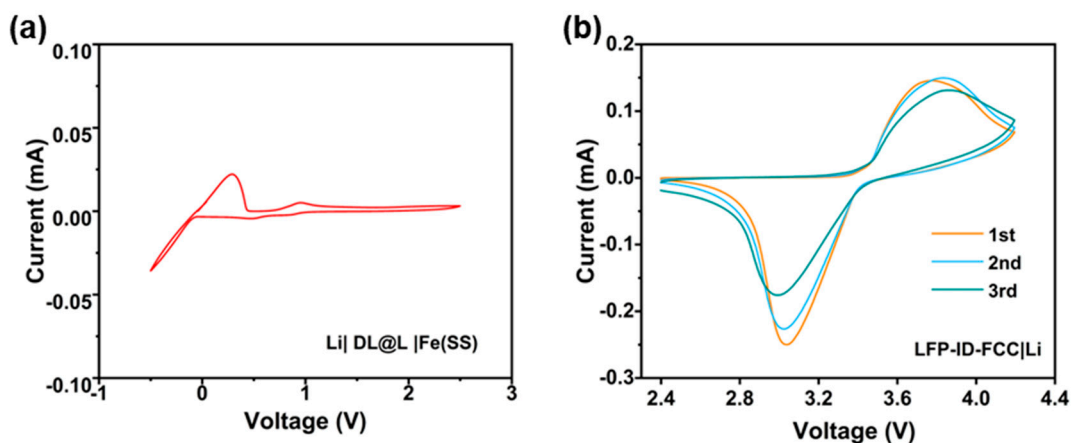

**Figure S3.** (a) Cyclic Voltammetry (CV) curve of the Li/DL@L/SS (stainless steel) cell from -0.5 to 2.5 V at a sweeping rate of  $0.5 \text{ mV s}^{-1}$  at 60 °C; (b) Cyclic Voltammetry (CV) curves of the LFP-ID-FCC/Li cell from 2.4 to 4.2 V at a sweeping rate of  $0.1 \text{ mV s}^{-1}$  at 60 °C.

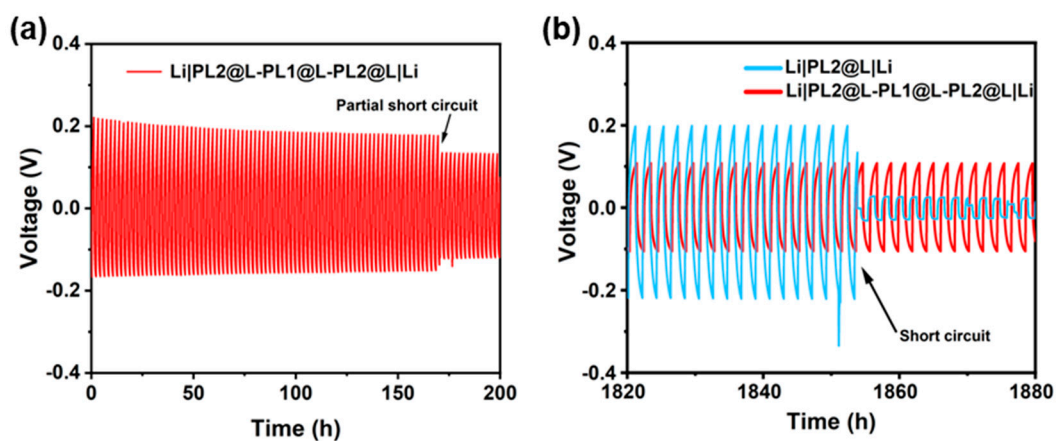

**Figure S4.** (a) The initial 200 cycles of voltage profile of the Li/PL2@L-PL1@L-PL2@L/Li symmetric cell at a fixed current density of  $0.05 \text{ mA cm}^{-2}$  at  $60^\circ\text{C}$ ; (b) Detailed voltage profiles under current densities of  $0.05 \text{ mA cm}^{-2}$  when a short circuit occurred in Li/PL2@L/Li symmetric cell.

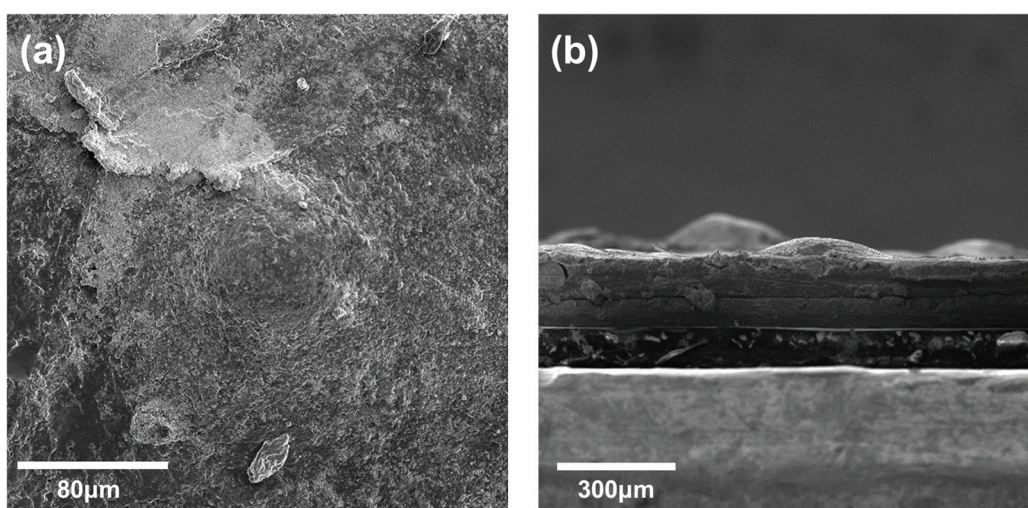

**Figure S5.** (a) Top-view SEM image of the surface morphology of the PL2@L layer of ID-FCC membrane after cycling; (b) Cross-sectional SEM image of ID-FCC after cycling, in which lithium-containing hills appear on the surface of ID-FCC in contact with Li.

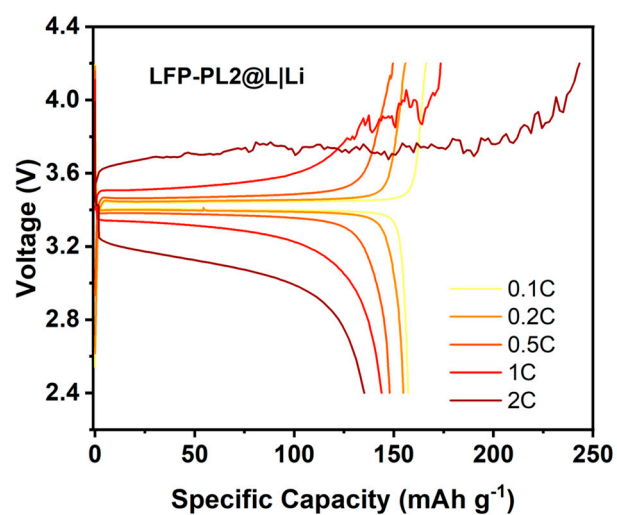

**Figure S6.** Galvanostatic charge-discharge voltage profiles of LFP-PL2@L/Li at the different rate.

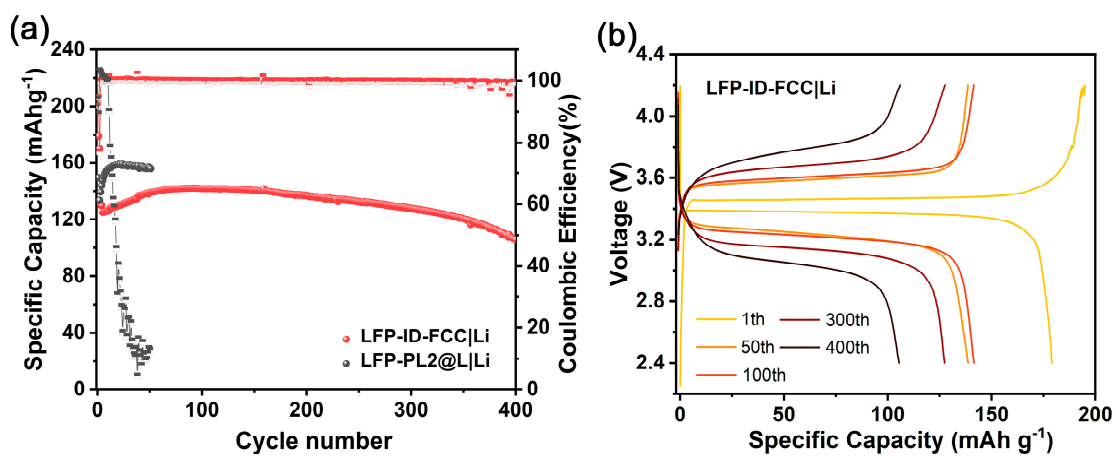

**Figure S7.** (a) Cycling performances of LFP-ID-FCC/Li and LFP-PL2@L/Li at 0.5 C; and (b) Galvanostatic charge-discharge voltage profiles of LFP-ID-FCC/Li at 0.5 C.

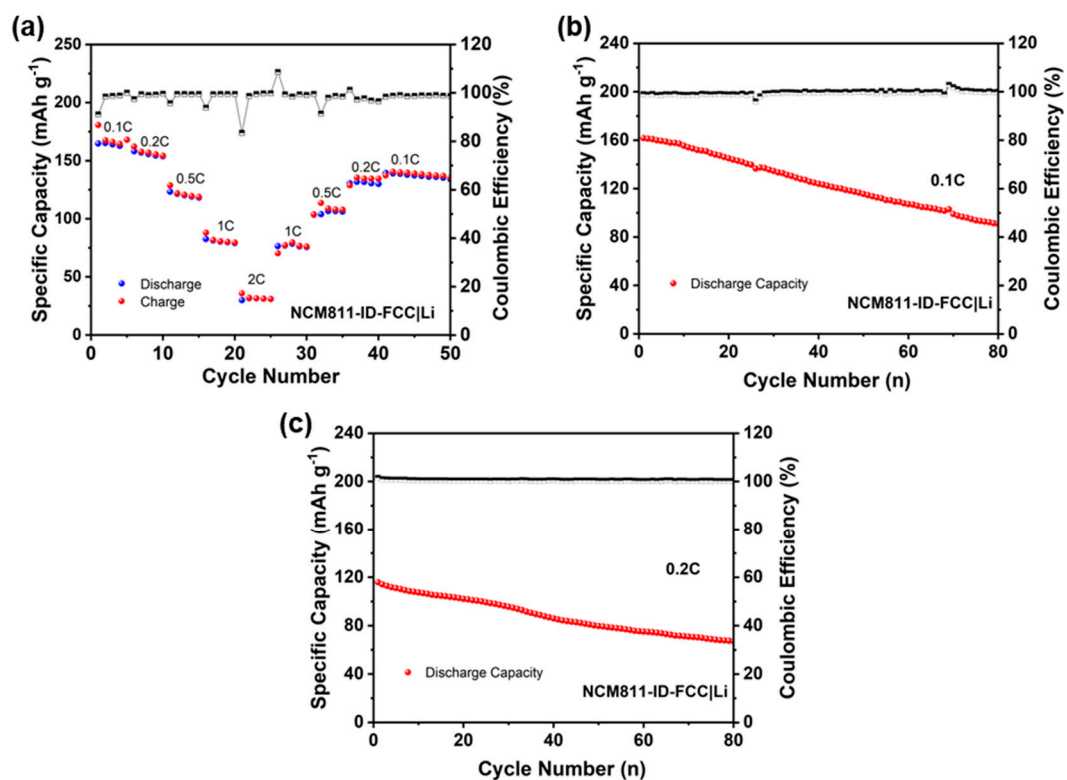

**Figure S8.** (a) Rate performance, (b) cycle performance at 0.1 C and (c) cycle performance at 0.2 C of NCM811-ID-FCC/Li.
